# Supplementary material for: M2 delta-to-oxalate pi* conjugation in oxalate-bridged complexes containing M-M quadruple bonds.
Source: Royal Society of Chemistry journal article supplement (doi:10.1039/b103898m), 2001-10-18
Supplement: b103898m.doc [file b103898m.doc]

###### Table 1

| [M2]n(OXA)n-1 | Number of Orbitals | |
| --- | --- | --- |
| Orbital | n = even | n = odd |
| [M2]  | n/2 b2g + n/2 b3u | (n+1)/2 b2g + (n-1)/2 b3u |
| [M2] * | n/2 b1g + n/2 au | (n-1)/2 b1g + (n+1)/2 au |
| filled oxalate (**A**) | n/2 b2g + (n-2)/2 b3u | (n-1)/2 b2g + (n-1)/2 b3u |
| empty oxalate (**B**) | (n-2)/2 b2g + n/2 b3u | (n-1)/2 b2g + (n-1)/2 b3u |

###### Details of Density Functional Theory Calculations

For this work, molecular and electronic structure determinations were performed under either rigid *D2*, *D2h* or *D4h* symmetry using both the Gaussian 981 and ADF 2000.012-5 programs. With Gaussian 98, we have used the B3LYP6-8 functional along with the 6-31G* basis set for H, C, N and O,9 and the SDD energy consistent pseudopotentials for Mo and W.10 With ADF 2000, we have used the exchange and correlation functionals of Perdew and Wang,11,12 along with a double- Slater basis set with d-type polarization functions for H, C, N and O (1s frozen core for C, N and O), and triple- basis sets were employed for both Mo (3d frozen core) and W (4d frozen core). ZORA scalar relativistic corrections were applied to all systems under ADF.13-17 All geometries were fully optimised at the above levels using the default optimisation criterion of the respective programs. Orbital analyses were completed with GaussView.18 Electronic transition energies and oscillator strengths were predicted using the time-dependent density functional theory (TDDFT) method implemented within the Gaussian 98 and ADF 2000.01 programs, and using the default optimization criteria (TDDFT).19-23

1M. J. Frisch, G. W. Trucks, H. B. Schlegel, G. E. Scuseria, M. A. Robb, J. R. Cheeseman, V. G. Zakrzewski, J. A. J. Montgomery, R. E. Stratmann, J. C. Burant, S. Dapprich, J. M. Millam, A. D. Daniels, K. N. Kudin, M. C. Strain, O. Farkas, J. Tomasi, V. Barone, M. Cossi, R. Cammi, B. Mennucci, C. Pomelli, C. Adamo, S. Clifford, J. Ochterski, G. A. Petersson, P. Y. Ayala, Q. Cui, K. Morokuma, D. K. Malick, A. D. Rabuck, K. Raghavachari, J. B. Foresman, J. Cioslowski, J. V. Ortiz, A. G. Baboul, B. B. Stefanov, G. Liu, A. Liashenko, P. Piskorz, I. Komaromi, R. J. Gomperts, R. L. Martin, D. J. Fox, T. Keith, M. A. Al-Laham, C. Y. Peng, A. Nanayakkara, M. Challacombe, P. M. W. Gill, B. Johnson, W. Chen, M. W. Wong, J. L. Andres, C. Gonzalez, M. Head-Gordon, E. S. Replogle and J. A. Pople, 'Gaussian 98 Version A9', Pittsburgh, PA, 1998.

2E. J. Baerends, D. E. Ellis and P. Ros, *Chem. Phys.*, 1973, **2**, 41.

3L. Versluis and T. Ziegler, *J. Chem. Phys.*, 1988, **88**, 322.

4G. te Velde and E. J. Baerends, *J. Comput. Phys.*, 1992, **99**, 84.

5C. F. Guerra, J. G. Snijders, G. Te Velde and E. J. Baerends, *Theor. Chem. Acc.*, 1998, **99**, 391.

6A. D. Becke, *Phys. Rev. A: Gen. Phys.*, 1988, **38**, 3098.

7A. D. Becke, *J. Chem. Phys.*, 1993, **98**, 5648.

8C. Lee, W. Yang and R. G. Parr, *Phys. Rev. B: Condens. Matter*, 1988, **37**, 785.

9W. J. Hehre, L. Radom, P. v. R. Schleyer and J. A. Pople, 'Ab initio Molecular Orbital Theory', John Wiley & Sons, 1986.

10D. Andrae, U. Haeussermann, M. Dolg, H. Stoll and H. Preuss, *Theor. Chim. Acta*, 1990, **77**, 123.

11J. P. Perdew and Y. Wang, *Phys. Rev. B: Condens. Matter*, 1992, **45**, 13244.

12J. P. Perdew, J. A. Chevary, S. H. Vosko, K. A. Jackson, M. R. Pederson, D. J. Singh and C. Fiolhais, *Phys. Rev. B: Condens. Matter*, 1992, **46**, 6671.

13E. van Lenthe, E. J. Baerends and J. G. Snijders, *J. Chem. Phys.*, 1993, **99**, 4597.

14E. van Lenthe, E. J. Baerends and J. G. Snijders, *J. Chem. Phys.*, 1994, **101**, 9783.

15E. van Lenthe, J. G. Snijders and E. J. Baerends, *J. Chem. Phys.*, 1996, **105**, 6505.

16E. Van Lenthe, R. Van Leeuwen, E. J. Baerends and J. G. Snijders, *Int. J. Quantum Chem.*, 1996, **57**, 281.

17E. van Lenthe, A. Ehlers and E.-J. Baerends, *J. Chem. Phys.*, 1999, **110**, 8943.

18GaussView 2.1, Gaussian Inc., Pittsburgh, PA, 1998.

19E. K. U. Gross and W. Kohn, *Adv. Quantum Chem.*, 1990, **21**, 255.

20R. Bauernschmitt and R. Ahlrichs, *Chem. Phys. Lett.*, 1996, **256**, 454.

21R. E. Stratmann, G. E. Scuseria and M. J. Frisch, *J. Chem. Phys.*, 1998, **109**, 8218.

22S. J. A. van Gisbergen, J. G. Snijders and E. J. Baerends, *Comput. Phys. Commun.*, 1999, **118**, 119.

23A. Rosa, E. J. Baerends, S. J. A. van Gisbergen, E. v. Lenthe, J. A. Groeneveld and J. G. Snijders, *J. Am. Chem. Soc.*, 1999, **121**, 10356.
